# Supplementary material
Source: Elsevier journal article supplement (https://publikationen.ub.uni-frankfurt.de/files/44116/mmc2.docx)
Supplement: mmc2 [file mmc2.docx]

**Table S1.** Sequence data included in this study.

|  |  | GenBank accession numbers | |  |  |
| --- | --- | --- | --- | --- | --- |
| Proposed name (name as published in GenBank) | Specimen/strain number | ITS | *β-tub* | Origin | Reference |
| *Coriolopsis caperata* | Mananti 1-9c | EU030132 | EU030074 | Panama | Bergemann et al. unpublished |
| *Ganoderma applanatum* (*G. oregonense*) | ASI-7063 | JQ520196 | JQ675649 | USA | Park et al. 2012a |
| *Ganoderma applanatum* | IUM-3985 | JQ520162 | JQ675615 | Netherlands | Park et al. 2012a |
| *Ganoderma lingzhi* (*G. lucidum*) | ASI-7037 | JQ520181 | JQ675634 | Korea | Park et al. 2012a |
| *Ganoderma lingzhi* (*G. lucidum*) | ASI-7117 | JQ520180 | JQ675633 | Korea | Park et al. 2012a |
| *Ganoderma lingzhi* | Cui 10165 | JQ781857 | - | Zhejiang, China | Cao et al. 2012 |
| *Ganoderma lingzhi* | Cui 4018 | JQ781856 | - | Jiangsu, China | Cao et al. 2012 |
| *Ganoderma lingzhi* | Cui 6982 | JQ781862 | - | Tianjin, China | Cao et al. 2012 |
| *Ganoderma lingzhi* | Cui 9166 | KJ143907 | - | Shandong, China | Zhou et al. 2015 |
| *Ganoderma lingzhi* | Dai 10631 | JQ781860 | - | Anhui, China | Cao et al. 2012 |
| *Ganoderma lingzhi* | Dai 12374 | JQ781867 | - | Yunan, China | Cao et al. 2012 |
| *Ganoderma lingzhi* | Dai 12443 | JQ781866 | - | Guangdong, China | Cao et al. 2012 |
| *Ganoderma lingzhi* | Dai 12447 | JQ781872 | - | Fujian, China | Cao et al. 2012 |
| *Ganoderma lingzhi* | Dai 12449 | JQ781873 | - | Jiangsu, China | Cao et al. 2012 |
| *Ganoderma lingzhi* | Dai 12574 | KJ143908 | - | Liaoning, China | Zhou et al. 2015 |
| *Ganoderma lingzhi* | Dai 3583 | JQ781868 | - | Hunan, China | Cao et al. 2012 |
| *Ganoderma lingzhi* | IFP 01021 | JQ781865 | - | Hubei, China | Cao et al. 2012 |
| *Ganoderma lingzhi* (*G. lucidum*) | IUM-4303 | JQ520182 | JQ675635 | Bangladesh | Park et al. 2012b |
| *Ganoderma lingzhi* (*G. lucidum*) | IUM-4310 | JQ520184 | JQ675637 | Bangladesh | Park et al. 2012b |
| *Ganoderma lingzhi* (*G. lucidum*) | KCTC 16802 | JQ520188 | JQ675641 | Thailand | Park et al. 2012a |
| *Ganoderma lingzhi* (*G. lucidum*) | KU-4006 | JQ520172 | JQ675625 | Korea | Park et al. 2012b |
| *Ganoderma lingzhi* (*G. lucidum*) | KU-4009 | JQ520173 | JQ675626 | Korea | Park et al. 2012b |
| *Ganoderma lingzhi* (*G. lucidum*) | KU-4015 | JQ520171 | JQ675624 | Korea | Park et al. 2012b |
| *Ganoderma lingzhi* (*G. lucidum*) | KU-4035 | JQ520207 | JQ675660 | Korea | Park et al. 2012b |
| *Ganoderma lingzhi* | Li 245 | JQ781863 | - | Henan, China | Cao et al. 2012 |
| ***Ganoderma lingzhi*** | **M9724** | **KU310901** | **KU310903** | **purchased in Germany** | **this study** |
| *Ganoderma lingzhi* (*G. lucidum*) | RDA (cultivar Yeongji 2) | JQ520169 | JQ675622 | Korea | Park et al. 2012b |
| *Ganoderma lingzhi* | Wu 1006-38 | JQ781858 | - | Hubei, China | Cao et al. 2012 |
| *Ganoderma lobatum* | ASI-7061 | JQ520166 | JQ675619 | USA | Park et al. 2012a |
| *Ganoderma lucidum* | Dai 11593 | JQ781852 | - | Finland | Cao et al. 2012 |
| *Ganoderma lucidum* | Dai 2272 | JQ781851 | - | Sweden | Cao et al. 2012 |
| *Ganoderma lucidum* | Dai 3937 | JQ781853 | - | Jilin, China | Cao et al. 2012 |
| *Ganoderma lucidum* (*G. oerstedii*) | GO138 | DQ425011 | DQ288098 | unknown | Su et al. unpublished |
| *Ganoderma lucidum* | IUM-4242 | JQ520186 | JQ675639 | China | Park et al. 2012b |
| *Ganoderma lucidum* | K 175217 | KJ143911 | - | UK | Zhou et al. 2015 |
| ***Ganoderma lucidum*** | **M9720** | KU310900 | KU310902 | **France, purchased in Germany** | **this study** |
| *Ganoderma lucidum* | MT 26/10 | KJ143912 | - | Czech Republic | Zhou et al. 2015 |
| *Ganoderma lucidum* | Rivoire 4195 | KJ143909 | - | France | Zhou et al. 2015 |
| *Ganoderma multipileum* | BCRC 37043 | EU021460 | - | Chinese Taiwan | Wang et al. unpublished |
| *Ganoderma multipileum* | CWN 04670 | KJ143913 | - | Taiwan, China | Zhou et al. 2015 |
| *Ganoderma multipileum* | Dai 9447 | KJ143914 | - | Hainan, China | Zhou et al. 2015 |
| *Ganoderma multipileum* | Dai 9521 | JQ781874 | - | Hainan, China | Cao et al. 2012 |
| *Ganoderma multipileum* (*G. lucidum*) | GL23 | GU726933 | DQ288073 | unknown | Harsh et al. unpublished |
| *Ganoderma oregonense* | ASI-7062 | JQ520195 | JQ675648 | USA | Park et al. 2012a |
| *Ganoderma oregonense* | CBS 265.88 | JQ781875 | - | Oregon, USA | Cao et al. 2012 |
| *Ganoderma oregonense* | CBS 266.88 | JQ781876 | - | Washington, USA | Cao et al. 2012 |
| *Ganoderma pfeifferi* | CBS 747.84 | JQ520198 | JQ675651 | Netherlands | Park et al. 2012b |
| *Ganoderma resinaceum* | ASI-7143 | JQ520203 | JQ675656 | Korea | Park et al. 2012b |
| *Ganoderma resinaceum* | CBS 152.27 | JQ520200 | JQ675653 | UK | Park et al. 2012b |
| *Ganoderma resinaceum* | CBS 194.76 | KJ143916 | - | Netherlands | Zhou et al. 2015 |
| *Ganoderma resinaceum* | IUM-3651 | JQ520204 | JQ675657 | Czech | Park et al. 2012b |
| *Ganoderma resinaceum* | Rivoire 4150 | KJ143915 | - | France | Zhou et al. 2015 |
| *Ganoderma sessile* | LDW 20121017 (IFP) | KJ143917 | - | CT, USA | Zhou et al. 2015 |
| *Ganoderma sessile* | NY 00985711 | KJ143918 | - | NY, USA | Zhou et al. 2015 |
| *Ganoderma sichuanense* | Cui 7691 | JQ781878 | - | Guangdong, China | Cao et al. 2012 |
| *Ganoderma sichuanense* | HMAS 42798 | JQ781877 | - | Sichuan, China | Cao et al. 2012 |
| *Ganoderma* sp. | ASI-7033 | JQ520208 | JQ675661 | Papua New Guinea | Park et al. 2012a |
| *Ganoderma* sp. | KU-4033 | JQ520206 | JQ675659 | Korea | Park et al. 2012a |
| *Ganoderma* sp. (*G. lucidum*) | ATCC 46755 | JQ520185 | JQ675638 | Canada | Park et al. 2012b |
| *Ganoderma* sp. (*G. oregonense*) | ASI-7049 | JQ520194 | JQ675647 | USA | Park et al. 2012a |
| *Ganoderma* sp. (*G. resinaceum*) | ATCC 52416 | JQ520199 | JQ675652 | Argentina | Park et al. 2012a |
| *Ganoderma* sp. (*G. resinaceum*) | CBS 220.36 | JQ520201 | JQ675654 | USA | Park et al. 2012b |
| *Ganoderma subamboinense* | ATCC 52420 | JQ520205 | JQ675658 | Argentina | Park et al. 2012b |
| *Ganoderma subamboinense* | GSUB136 | DQ425005 | DQ288096 | unknown | Su et al. unpublished |
| *Ganoderma tropicum* | BCRC 37122 | EU021457 | - | Chinese Taiwan | Wang et al. unpublished |
| *Ganoderma tropicum* | Dai 9724 | JQ781879 | - | Hainan, China | Cao et al. 2012 |
| *Ganoderma tropicum* | Yuan 3490 | JQ781880 | - | Yunnan, China | Cao et al. 2012 |
| *Ganoderma tsugae* | Dai 12751b | KJ143919 | - | CT, USA | Zhou et al. 2015 |
| *Ganoderma tsugae* | Dai 12760 | KJ143920 | - | CT, USA | Zhou et al. 2015 |
| *Ganoderma tsugae* | GT132 | DQ425002 | DQ288093 | unknown | Su et al. unpublished |
| *Ganoderma tsugae* | GT133 | DQ425003 | DQ288094 | unknown | Su et al. unpublished |
| *Ganoderma tsugae* | KU-4018 | JQ520216 | JQ675669 | USA | Park et al. 2012b |
| *Ganoderma valesiacum* | CBS 428.84 | JQ520218 | JQ675671 | USA | Park et al. 2012b |
| *Ganoderma weberianum* | CBS 219.36 | JQ520219 | JQ675672 | Philippines | Park et al. 2012b |
